# Supplementary material for: New Approach for Direct Determination of Manganese Valence State in Ferromanganese Nodules by X-ray Fluorescence Spectrometry
Source: MDPI journal article supplement (doi:10.3390/min13101329), 2023-10-14
Supplement: s1 [file s1]

# Supplementary Materials: New Approach for Direct Determination of Manganese Valence State in Ferromanganese Nodules by X-ray Fluorescence Spectrometry

Chubarov V.M.

**Table S1.** Calibration curves.

| Equation Number | Analytical Parameter       | Spectral Overlap  | Equation                                                                                                                                               |
|-----------------|----------------------------|-------------------|--------------------------------------------------------------------------------------------------------------------------------------------------------|
| Equation 3.2    | $MnK\beta_5/Mn\beta_{1,3}$ | $FeK\alpha_{1,2}$ | $N^{Mn} = -2.2044 + 161.6282 \cdot (I(MnK\beta_5)/I(Mn\beta_{1,3})) - 0.00197 \cdot I(FeK\alpha_{1,2})$                                                |
| Equation 3.4    | $MnK\beta'/Mn\beta_{1,3}$  | $FeK\alpha_{1,2}$ | $N^{Mn} = 27.6222 - 50.8719 \cdot (I(MnK\beta')/I(Mn\beta_{1,3})) + 0.0015 \cdot I(FeK\alpha_{1,2})$                                                   |
| Equation 3.5    | $MnK\beta_5/Mn\beta_{1,3}$ | -                 | $N^{Mn} = 15.2209 - 30.3495 \cdot (I(MnK\beta')/I(Mn\beta_{1,3})) + 75.2641 \cdot (I(MnK\beta_5)/I(Mn\beta_{1,3})) - 0.00197 \cdot I(FeK\alpha_{1,2})$ |
| Equation 3.6    | $MnK\beta'/Mn\beta_{1,3}$  | $FeK\alpha_{1,2}$ | $N^{Mn} = 9.5541 + 106.7648 \cdot (I(MnK\beta_5)/I(Mn\beta_{1,3})) - 20.7224 \cdot (I(MnK\beta')/I(Mn\beta_{1,3})) - 0.0007 \cdot I(FeK\alpha_{1,2})$  |

**Table S2.** Results of volumetric (vt) and XRF determination of average manganese valence state ( $N^{Mn}$ ) and recalculation to  $MnO_2$  content.

| Sample | $N^{Mn}$ |                                         |                                     |                                                         |                                                                   | $MnO_2$ Content, wt. % |                                      |                                     |                                                                   |                                                                   |
|--------|----------|-----------------------------------------|-------------------------------------|---------------------------------------------------------|-------------------------------------------------------------------|------------------------|--------------------------------------|-------------------------------------|-------------------------------------------------------------------|-------------------------------------------------------------------|
|        | vt       | Analytical Parameter (Spectral Overlap) |                                     |                                                         |                                                                   | vt                     | Analytical Parameter                 |                                     |                                                                   |                                                                   |
|        |          | $MnK\beta_5/Mn\beta_{1,3}$<br>(FeKa)    | $MnK\beta'/Mn\beta_{1,3}$<br>(FeKa) | $MnK\beta_5/Mn\beta_{1,3}$<br>$MnK\beta'/Mn\beta_{1,3}$ | $MnK\beta_5/Mn\beta_{1,3}$<br>$MnK\beta'/Mn\beta_{1,3}$<br>(FeKa) |                        | $MnK\beta_5/Mn\beta_{1,3}$<br>(FeKa) | $MnK\beta'/Mn\beta_{1,3}$<br>(FeKa) | $MnK\beta_5/Mn\beta_{1,3}$<br>$MnK\beta'/Mn\beta_{1,3}$<br>(FeKa) | $MnK\beta_5/Mn\beta_{1,3}$<br>$MnK\beta'/Mn\beta_{1,3}$<br>(FeKa) |
| 1      | 3.80     | 3.82                                    | 3.84                                | 3.84                                                    | 3.83                                                              | 29.76                  | 30.01                                | 30.29                               | 30.42                                                             | 30.16                                                             |
| 2      | 3.86     | 3.89                                    | 3.70                                | 3.82                                                    | 3.77                                                              | 37.46                  | 38.02                                | 34.23                               | 36.68                                                             | 35.59                                                             |
| 3      | 3.59     | 3.74                                    | 3.61                                | 3.69                                                    | 3.65                                                              | 37.46                  | 41.21                                | 38.10                               | 40.03                                                             | 39.03                                                             |
| 4      | 3.89     | 3.77                                    | 3.87                                | 3.82                                                    | 3.84                                                              | 43.17                  | 40.42                                | 42.84                               | 41.75                                                             | 42.06                                                             |
| 5      | 3.89     | 3.88                                    | 4.06                                | 3.98                                                    | 4.01                                                              | 46.03                  | 45.79                                | 50.25                               | 48.21                                                             | 49.04                                                             |
| 6      | 3.86     | 3.91                                    | 3.89                                | 3.92                                                    | 3.91                                                              | 41.19                  | 42.37                                | 41.92                               | 42.56                                                             | 42.34                                                             |
| 7      | 3.99     | 3.87                                    | 3.76                                | 3.84                                                    | 3.80                                                              | 48.48                  | 45.39                                | 42.88                               | 44.66                                                             | 43.83                                                             |
| 8      | 3.87     | 3.82                                    | 3.78                                | 3.82                                                    | 3.79                                                              | 32.23                  | 31.36                                | 30.69                               | 31.34                                                             | 30.88                                                             |
| 9      | 3.91     | 3.73                                    | 3.77                                | 3.76                                                    | 3.75                                                              | 34.64                  | 31.44                                | 32.20                               | 32.00                                                             | 31.80                                                             |
| 10     | 3.93     | 3.93                                    | 3.77                                | 3.88                                                    | 3.83                                                              | 38.81                  | 38.81                                | 35.59                               | 37.79                                                             | 36.80                                                             |
| 11     | 3.96     | 3.83                                    | 3.65                                | 3.76                                                    | 3.71                                                              | 50.91                  | 47.60                                | 42.75                               | 45.75                                                             | 44.48                                                             |
| 12     | 3.92     | 3.90                                    | 3.66                                | 3.81                                                    | 3.75                                                              | 44.97                  | 44.52                                | 38.80                               | 42.34                                                             | 40.89                                                             |
| 13     | 3.92     | 3.83                                    | 4.06                                | 3.95                                                    | 3.99                                                              | 49.15                  | 46.84                                | 52.93                               | 49.94                                                             | 51.10                                                             |
| 14     | 3.92     | 3.88                                    | 4.06                                | 3.98                                                    | 4.01                                                              | 46.95                  | 45.91                                | 50.38                               | 48.33                                                             | 49.17                                                             |
| 15     | 3.93     | 3.97                                    | 3.87                                | 3.95                                                    | 3.92                                                              | 41.01                  | 41.97                                | 39.75                               | 41.42                                                             | 40.81                                                             |
